# Supplementary material
Source: PubMed Central journal article supplement (PMC3281639)
Supplement: supp_M111.278994_jbc.M111.278994-1.pdf [file supp_M111.278994_jbc.M111.278994-1.pdf]

Supplementary information

Figure S1

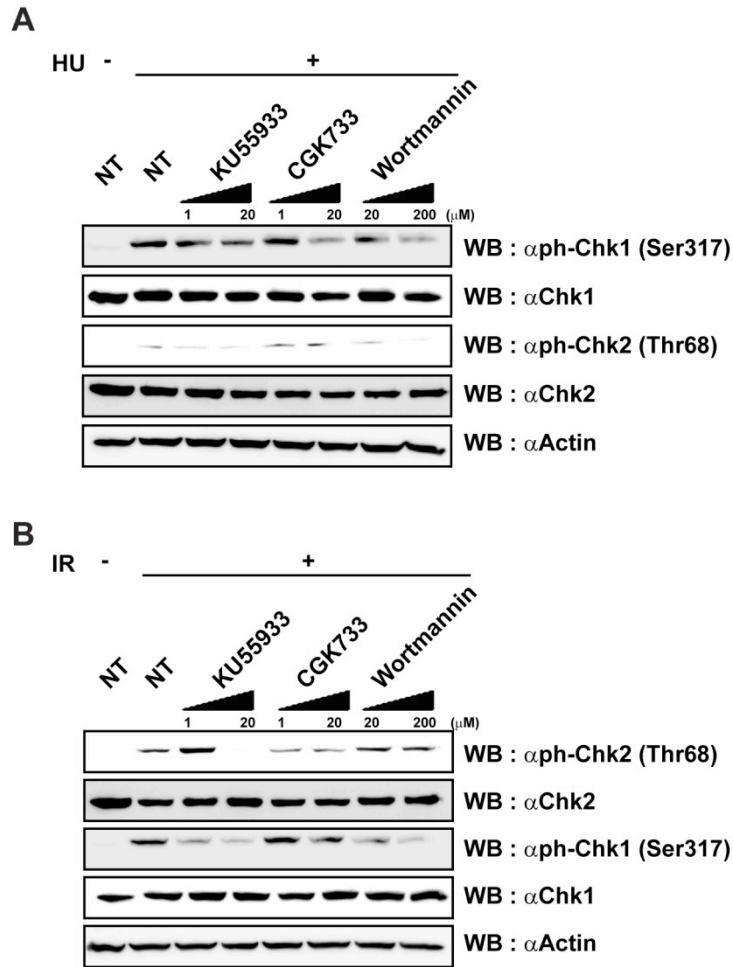

**Figure S1. Validation of ATM and/or ATR inhibitors in HeLa\_CFLAP\_BRCA2\_hTert cells.** HeLa\_CFLAP\_BRCA2\_hTert cells were treated with increasing concentrations of KU55933 (1 $\mu$ M, 20 $\mu$ M) or CGK733 (1 $\mu$ M, 20 $\mu$ M) for 1 h prior to addition of 2.5 mM hydroxyurea (HU) for 2 h (A) or irradiation (10 Gy) (B). The PI3 kinase inhibitor wortmannin was included for control. (A) Cell lysates obtained from HeLa\_CFLAP\_BRCA2\_hTert cells with (+) or without (-) HU (2.5mM) treatment (2 h) were analyzed by Western blot with specific antibodies for Serine-317 phosphorylation of Chk1 ( $\alpha$ ph-Chk1 (Ser317)) or Threonine-68 phosphorylation of Chk2 ( $\alpha$ ph-Chk2 (Thr68)). Blots were reprobbed with anti-Chk1, anti-Chk2 or anti-Actin antibodies for loading controls. (B) WB analysis of HeLa\_CFLAP\_BRCA2\_hTert cells before or after irradiation. Phospho-Chk1 or phospho-Chk2 was assessed as in (A).
